# Supplementary material for: In situ decorated Cu2FeSnS4 nanosheet arrays for low voltage hydrogen production through the ammonia oxidation reaction
Source: Royal Society of Chemistry journal article supplement (doi:10.1039/d3qm00291h), 2023-01-01
Supplement: d3qm00291h1.pdf [file d3qm00291h1.pdf]

## Supporting Information

### **In situ Decorated Cu<sub>2</sub>FeSnS<sub>4</sub> Nanosheet Arrays for Low Voltage Hydrogen Production through Ammonia Oxidation Reaction**

Yoongu Lim,<sup>†a</sup> Subramani Surendran,<sup>†a</sup> Won So,<sup>b</sup> Sathyanarayanan Shanmugapriya,<sup>a</sup> Chanmin Jo,<sup>a</sup> Gnanaprakasam Janani,<sup>a</sup> Hyeonuk Choi,<sup>c</sup> Hyun Soo Han,<sup>d</sup> Heechae Choi,<sup>e</sup> Young-Hoon Yun,<sup>f</sup> Tae-Hoon Kim,<sup>g</sup> Myeong-Jin Kim,<sup>h</sup> Kyoungsuk Jin,<sup>i</sup> Jung Kyu Kim,<sup>\*,b</sup> and Uk Sim,<sup>\*,a,j,k</sup>

<sup>a</sup> *Hydrogen Energy Technology Laboratory, Korea Institute of Energy Technology (KENTECH), Naju, Jeonnam 58330, Republic of Korea. E-mail: [usim@kentech.ac.kr](mailto:usim@kentech.ac.kr) (U. Sim)*

<sup>b</sup> *School of Chemical Engineering, Sungkyunkwan University, 2066 Seobu-ro, Jangan-gu, Suwon, 16419, Republic of Korea. Email: [legkim@skku.edu](mailto:legkim@skku.edu) (J. K. Kim)*

<sup>c</sup> *Department of Materials Science and Engineering, Korea Advanced Institute of Science and Technology, 291 Daehak-ro, Yuseong-gu, Daejeon 34141, Republic of Korea*

<sup>d</sup> *Department of Mechanical Engineering, Stanford University, Stanford, CA 94305, USA*

<sup>e</sup> *Department of Chemistry, Xi'an Jiaotong-Liverpool University, Suzhou, 215123, China*

<sup>f</sup> *Department of New & Renewable Energy, Dongshin University, Jeonnam 520-714, Republic of Korea*

<sup>g</sup> *Department of Materials Science and Engineering, Chonnam National University, Gwangju, 61186, Republic of Korea*

<sup>h</sup> *Department of Hydrogen & Renewable Energy, Kyungpook National University, Daegu, 41566, Republic of Korea*

<sup>i</sup> *Department of Chemistry, Korea University, Seoul, 02841 Republic of Korea*

<sup>j</sup> *Research Institute, NEEL Sciences, INC., Naju, Republic of Korea.*

<sup>k</sup> *Center for Energy Storage System, Chonnam National University, Gwangju, Republic of Korea.*

<sup>†</sup> *These authors contributed equally to this work.*

## Electrochemical measurements

Electrochemical characterization of the CFTS nanosheets was carried out using potentiostat equipment (Bio-Logic SP150 instrumentation) at room temperature in a three-electrode cell configuration where the synthesized active material was used as the working electrode. The platinum (Pt) wire and Hg/HgO electrode were used as counter and reference electrodes. 1 M KOH solution with and without 0.5 M NH<sub>4</sub>OH was used as electrolytes to investigate the AOR activity. As the electrochemical data was measured with Hg/HgO reference electrode, the potential range was calibrated to the reversible hydrogen electrode (RHE) potential standard with  $E^0_{(\text{Hg}/\text{HgO})} = 118 \text{ mV}$  using the following equation.

$$E_{\text{RHE}} = E_{(\text{Hg}/\text{HgO})} + E^0_{\text{Hg}/\text{HgO}} + 0.059 \times \text{pH}$$

Electrochemical impedance spectroscopy measurements were conducted, and Bode plots were obtained in the frequency range of ~0.1–105 Hz at 0 V vs. Hg/HgO. A flow-type lab-scale water electrolyzer setup was performed with 1 M KOH and 1 M KOH with 0.5 M NH<sub>4</sub>OH electrolyte as catholyte and anolyte, respectively. The electrodes are separated using a Nafion membrane. The catholyte and anolyte are fed into the respective chambers by a separate peristaltic pump which carries the resultant product after electrolysis. The obtained H<sub>2</sub> gas is collected in an air-tight receptacle and measured with a gas H<sub>2</sub> gas detector.

### **The calculation of Turnover frequency (TOF)**

TOF of catalyst: The number of oxygen turnovers was calculated from the current density using the following equation,

$$\text{TOF} = j * A_g / 4 * F * n$$

where  $j$  is the measured current density at 1.8, 1.9, 2.0, 2.1, and 2.2 V, respectively;  $A_g$  is the surface area of the electrode;  $F$  is the Faraday constant ( $96485.3 \text{ C mol}^{-1}$ ); and  $n$  is the moles of the catalyst loaded on the electrode.

### **The calculation of Faradaic efficiency**

The electrocatalytic water splitting experiment was conducted in a two-electrode system, with EG-CFTS ( $1 \text{ cm} \times 1 \text{ cm}$ ) as the cathode and anode.

The Faradaic efficiency is calculated by  $\text{FE}(\%) = n_{\text{exp}}/n_{\text{Theo}}$ ,

Where  $n_{\text{exp}}$  means the total number of moles of the collected  $\text{H}_2$  and  $\text{O}_2$  gases and

$n_{\text{Theo}} = 3Q/(4F)$  ( $Q$  is the charge passing through the electrodes, and  $F$  is Faraday constant).

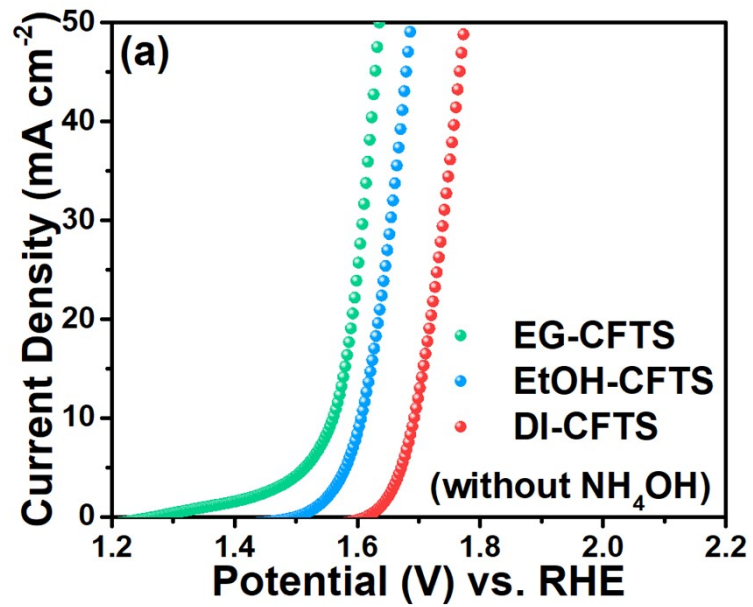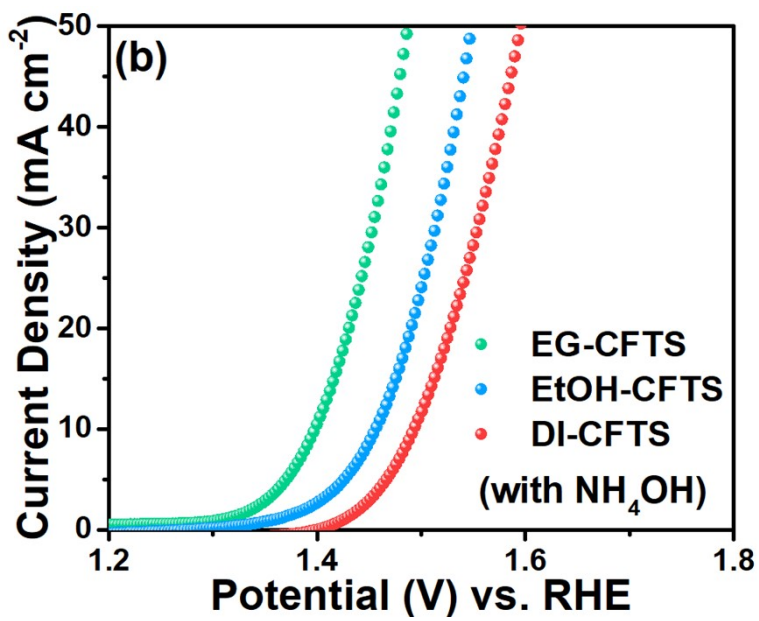

**Fig. S1** Magnified images of (a) OER and (b) AOR LSV polarization curves depicting the overpotential at  $10 \text{ mA cm}^{-2}$ , respectively.

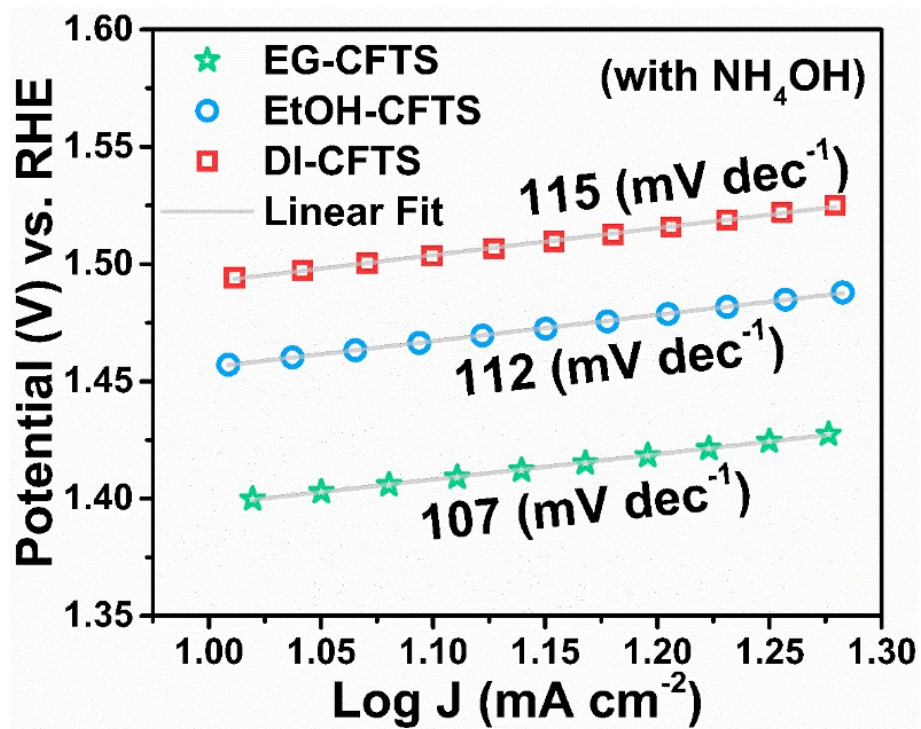

Fig. S2 Tafel plot for the prepared CFTS electrocatalysts.

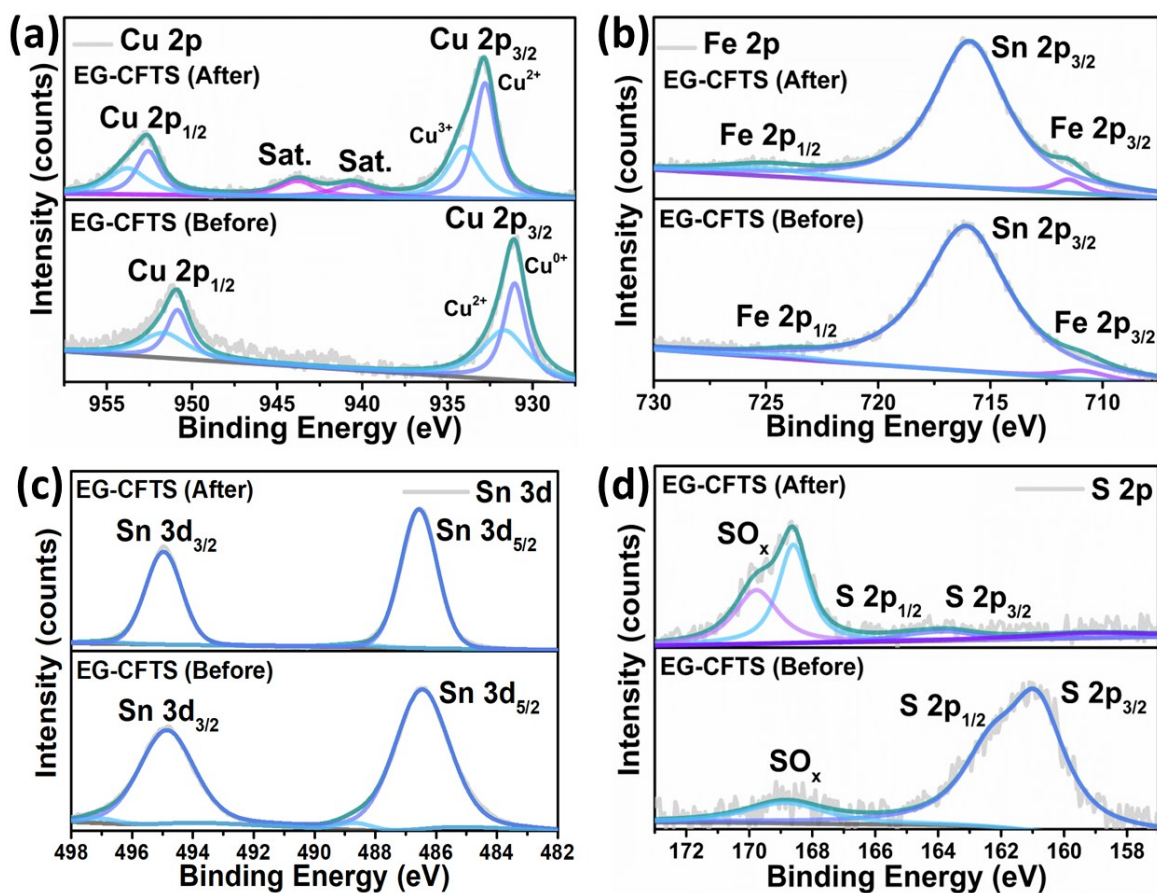

**Fig. S3** High-resolution XPS spectra for EG-CFTS samples before and after electrochemical tests: a) Cu 2p, b) Fe 2p, c) Sn 3d, and d) S 2p, respectively.

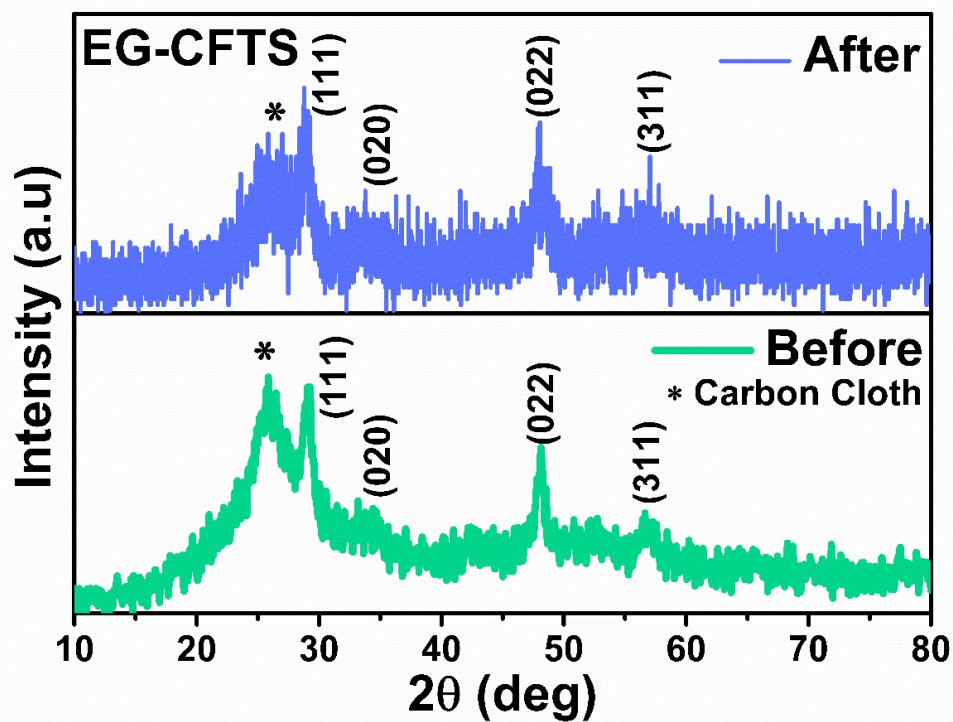

Fig. S4 XRD spectra before and after electrochemical tests for EG-CFTS samples.

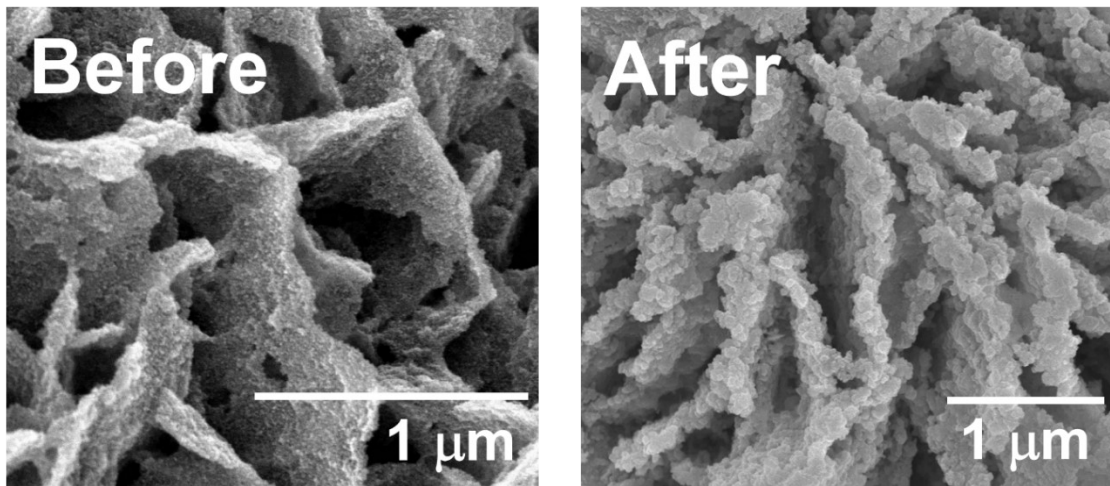

**Fig. S5** SEM images for EG-CFTS samples before and after electrochemical tests.



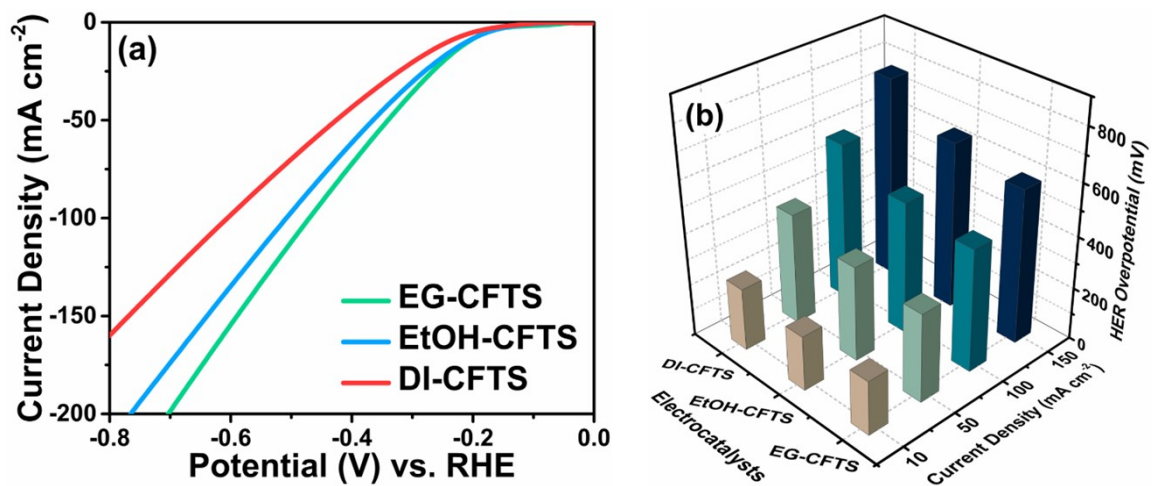

**Fig. S6** a) Linear sweep voltammetry (LSV) analysis and b). Comparison of current density and their corresponding HER overpotentials for the prepared CFTS electrocatalysts.

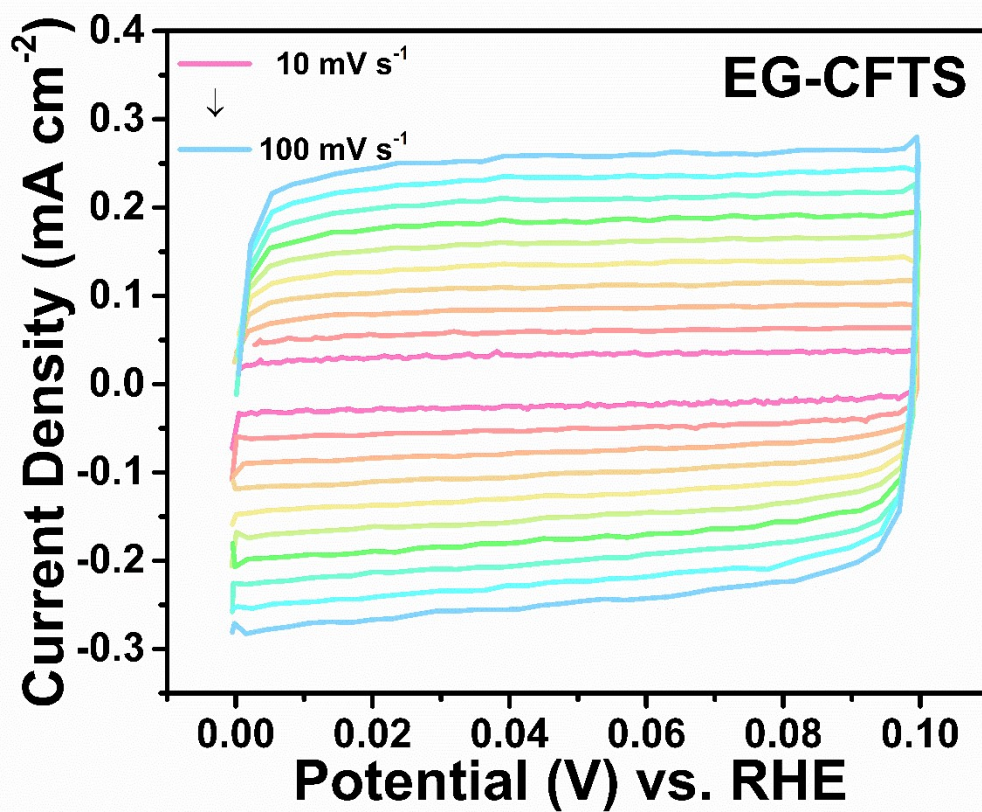

**Fig. S7** Cyclic Voltammograms of EG-CFTS electrocatalyst in the non-faradaic region at the scan rates from 10 to 100 mV s<sup>-1</sup>.

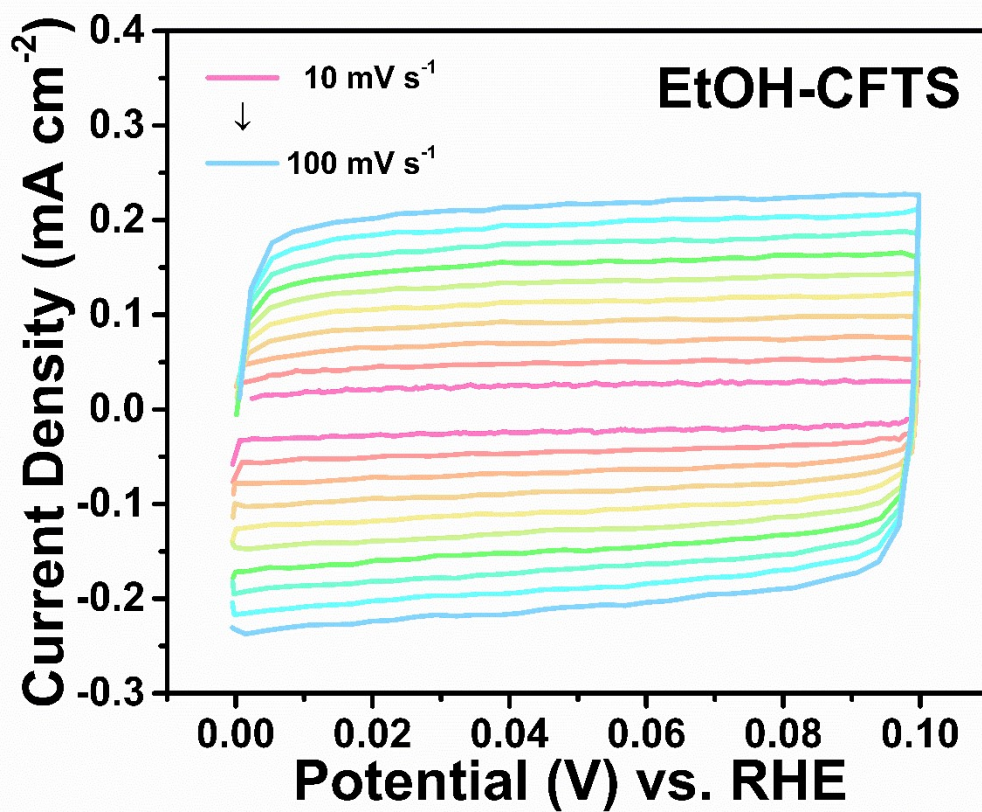

**Fig. S8** Cyclic Voltammograms of EtOH-CFTS electrocatalyst in the non-faradaic region at the scan rates from 10 to 100 mV s<sup>-1</sup>.

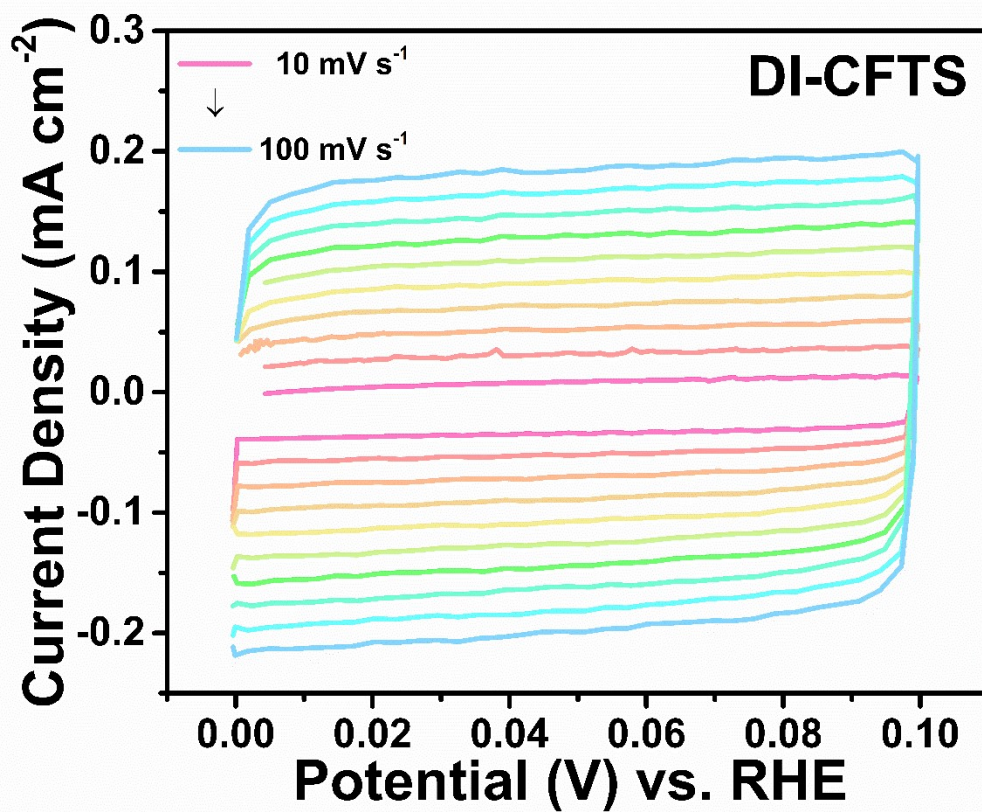

**Fig. S9** Cyclic Voltammograms of DI-CFTS electrocatalyst in the non-faradaic region at the scan rates from 10 to 100 mV s<sup>-1</sup>.

**Table S1** EIS spectra fitting parameters.

| <b>Electrocatalysts</b> | <b>R1<br/>(<math>\Omega</math>)</b> | <b>R2<br/>(<math>\Omega</math>)</b> | <b>S4<br/>(<math>\Omega \cdot s^{-1/2}</math>)</b> |
|-------------------------|-------------------------------------|-------------------------------------|----------------------------------------------------|
| <b>EG-CFTS</b>          | 1.169                               | 0.384                               | 364.5                                              |
| <b>EtOH-CFTS</b>        | 1.322                               | 0.413                               | 377.7                                              |
| <b>DI-CFTS</b>          | 1.317                               | 0.496                               | 622.1                                              |

**Table S2** Comparison of previously reported Cu-based electrocatalysts and their AOR performances.

| Catalyst                                                                                   | AOR Onset potential (V) | Electrolyte/ Solution                                        | Potential          | Current density (mA/cm <sup>2</sup> )  | Area of electrode (cm <sup>2</sup> ) | Ref.      |
|--------------------------------------------------------------------------------------------|-------------------------|--------------------------------------------------------------|--------------------|----------------------------------------|--------------------------------------|-----------|
| EG-CFTS                                                                                    | 1.38 V vs. RHE          | 1 M KOH + 0.5 M NH <sub>4</sub> OH                           | 1.6 V vs. RHE      | 152.4 mA cm <sup>-2</sup>              | 1 x 1                                | This work |
| EtOH-CFTS                                                                                  | 1.42 V vs. RHE          | 1 M KOH + 0.5 M NH <sub>4</sub> OH                           | 1.6 V vs. RHE      | 96.1 mA cm <sup>-2</sup>               | 1 x 1                                | This work |
| DI-CFTS                                                                                    | 1.51 V vs. RHE          | 1 M KOH + 0.5 M NH <sub>4</sub> OH                           | 1.6 V vs. RHE      | 57.3 mA cm <sup>-2</sup>               | 1 x 1                                | This work |
| NiCu/CP                                                                                    | 0.47 V vs. Ag/AgCl      | 0.5 M NaOH + 55 mM NH <sub>4</sub> Cl                        | 0.7 V vs. Ag/AgCl  | 52 mA cm <sup>-2</sup>                 | 2                                    | S1        |
| NiCu layered hydroxides (LHs)                                                              | ~0.43 V vs. Ag/AgCl     | 0.5 M NaOH + 55 mM NH <sub>4</sub> Cl                        | 0.55 V vs. Ag/AgCl | 35 mA cm <sup>-2</sup>                 | 1 x 3                                | S2        |
| Defect engineered CuO                                                                      | 0.29 V vs. Hg/HgO       | 1 M KOH + 1 M NH <sub>3</sub>                                | 0.6 V vs. Hg/HgO   | 200 mA cm <sup>-2</sup>                | 2 x 1                                | S3        |
| Ni-(OH) <sub>2</sub> -Cu <sub>2</sub> O@CuO                                                | 0.47 V vs. Hg/HgO       | 1 M KOH + 1 M NH <sub>3</sub>                                | 0.6 V vs. Hg/HgO   | 60 mA cm <sup>-2</sup>                 | 3 x 5                                | S4        |
| NiCu/C/CP                                                                                  | 0.39 V vs. Hg/HgO       | 1 M KOH + 0.5 M NH <sub>3</sub>                              | 0.65 V vs. Hg/HgO  | 110.4 mA cm <sup>-2</sup>              | 1 x 1                                | S5        |
| CuSn(OH) <sub>6</sub>                                                                      | 0.85 V vs. Hg/HgO       | 0.5 M K <sub>2</sub> SO <sub>4</sub> + 10 mM NH <sub>3</sub> | 1.23 V vs. Hg/HgO  | 0.85 mA cm <sup>-2</sup>               | 1 x 0.5                              | S6        |
| PtIrCu HCOND                                                                               | 0.35 V vs. RHE          | 0.1 M NH <sub>3</sub> + 1 M KOH                              | 0.65 V vs. RHE     | 31.8 A g <sub>PtIr</sub> <sup>-1</sup> | 0.196 (Glassy carbon)                | S7        |
| La <sub>0.5</sub> Sr <sub>1.5</sub> Ni <sub>0.9</sub> Cu <sub>0.1</sub> O <sub>δ</sub> -Ar | ~0.4 V vs. Ag/AgCl      | 0.5 M KOH + 55 mM NH <sub>4</sub> Cl                         | 0.53 V vs. Ag/AgCl | 13.4 mA cm <sup>-2</sup>               | --                                   | S8        |
| LNCO55-Ar                                                                                  | 0.42 V vs. Ag/AgCl      | 0.5 M KOH + 55 mM NH <sub>4</sub> Cl                         | 0.5 V vs. Ag/AgCl  | 14.4 mA cm <sup>-2</sup>               | 2.5 x 2.5                            | S9        |
| NiCu/MnO <sub>2</sub>                                                                      | 0.53 V vs. Hg/HgO       | 0.5 M NaOH + 55 mM NH <sub>4</sub> Cl                        | 0.6 V vs. Hg/HgO   | 8.2 mA cm <sup>-2</sup>                | 1 x 1                                | S10       |

## References

[S1] W. Xu, D. Du, R. Lan, J. Humphreys, D. N. Miller, M. Walker, Z. Wu, J. T. S. Irvine and S. Tao, Applied Catalysis B: Environmental, 2018, 237, 1101-1109.

- [S2] W. Xu, R. Lan, D. Du, J. Humphreys, M. Walker, Z. Wu, H. Wang and S. Tao, *Applied Catalysis B: Environmental*, 2017, 218, 470-479.
- [S3] J. Huang, Z. Chen, J. Cai, Y. Jin, T. Wang and Jianhui Wang, *Nano Res.*, 2022, **15**, 5987–5994.
- [S4] J. Huang, J. Cai, and J. Wang, *ACS Appl. Energy Mater.*, 2020, **3**, 4108–4113.
- [S5] H. Zhang, Y. Wang, Z. Wu, D. Y. C. Leung, *Energy Procedia*, 2017, **142**, 1539-1544.
- [S6] J. Hou, Y. Cheng, H. Pan and P. Kang, *ChemElectroChem* 2022, 9, e202101301.
- [S7] X. Lin, X. Zhang, Z. Wang, X. Zhu, J. Zhu, P. Chen, T. Lyu, C. Li, Z. Q. Tian, P. K. Shen, *Journal of Colloid and Interface Science*, 2021, 601, 1–11.
- [S8] M. Zhang, P. Zou, G. Jeerh, B. Sun, M. Walker and S. Tao, *Adv. Funct. Mater.* 2022, 32, 2204881.
- [S9] M. Zhang, H. Li, X. Duan, P. Zou, G. Jeerh, B. Sun, S. Chen, J. Humphreys, M. Walker, K. Xie and S. Tao, *Adv. Sci.* 2021, 8, 2101299
- [S10] K. Nagita, Y. Yuhara, K. Fujii, Y. Katayama and M. Nakayama, *ACS Appl. Mater. Interfaces* 2021, 13, 28098–28107.
